# Supplementary material for: Singlet oxygen formation in non-aqueous oxygen redox chemistry: direct spectroscopic evidence for formation pathways and reliability of chemical probes
Source: Royal Society of Chemistry journal article supplement (doi:10.1039/d3fd00088e), 2023-05-17
Supplement: d3fd00088e1.pdf [file d3fd00088e1.pdf]

## Supplementary Information

### Singlet oxygen in non-aqueous oxygen redox: direct spectroscopic evidence for formation pathways and reliability of chemical probes

Soumyadip Mondal,<sup>a</sup> Rajesh B. Jethwa,<sup>a</sup> Bhargavi Pant,<sup>a</sup> Robert Hauschild,<sup>a</sup> Stefan A. Freunberger,<sup>\*a</sup>

<sup>a</sup> Institute of Science and Technology Austria (ISTA), Am Campus 1, 3400 Klosterneuburg, Austria

### Supplementary Methods

**Generation of DMA-O<sub>2</sub>.** DMA reacts with <sup>1</sup>O<sub>2</sub> to form DMA-O<sub>2</sub>. <sup>1</sup>O<sub>2</sub> was generated photochemically by illuminating O<sub>2</sub> saturated solutions containing 1 μM of the photosensitizer palladium(II) *meso*-tetra(4-fluorophenyl)tetrabenzoporphyrin (Pd<sub>4</sub>F) at a wavelength of 643 nm in presence of DMA.<sup>1</sup>

**Electrochemical oxidation of DMA.** The electrosynthesis was done in a custom-made H-cell. The cathodic compartment consists of Pt working electrode with 5mL of 2mM DMA solution in 10 mM KClO<sub>4</sub> in acetonitrile. The anodic compartment consists of Ni foam as counter electrode with 5 mL of 100 mM 1,4-benzoquinone solution in acetonitrile. The two compartment was separated by K<sup>+</sup> selective ion-exchange membrane. Partially de-lithiated Li<sub>(1-x)</sub>FePO<sub>4</sub> (MTI corporation) was used as reference electrode in the cathodic compartment. DMA was oxidized by galvanostatic charging until 80% of the total capacity was reached.

### Supplementary Figures

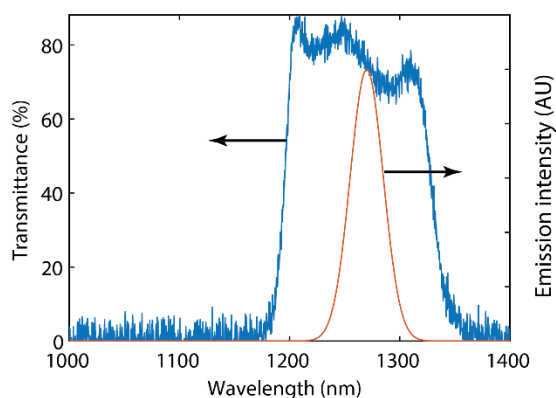

**Fig. S1** Transmission data of the bandpass filter used for chemiluminescence from singlet oxygen (<sup>1</sup>O<sub>2</sub>) and simulated <sup>1</sup>O<sub>2</sub> NIR emission at 1270 nm based on literature report.<sup>2, 3</sup>

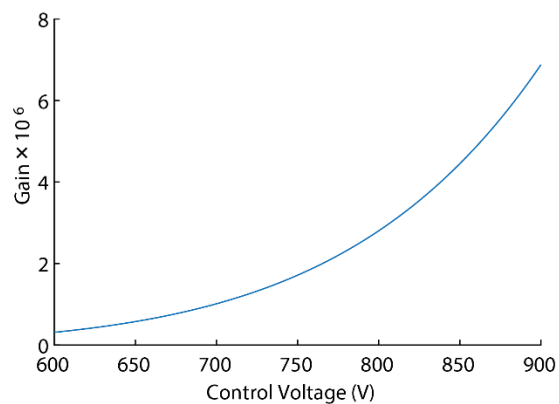

**Fig. S2** Gain of the PMT detector vs control voltage. All signals from the PMT detector are normalised at a gain of 600 V control voltage.

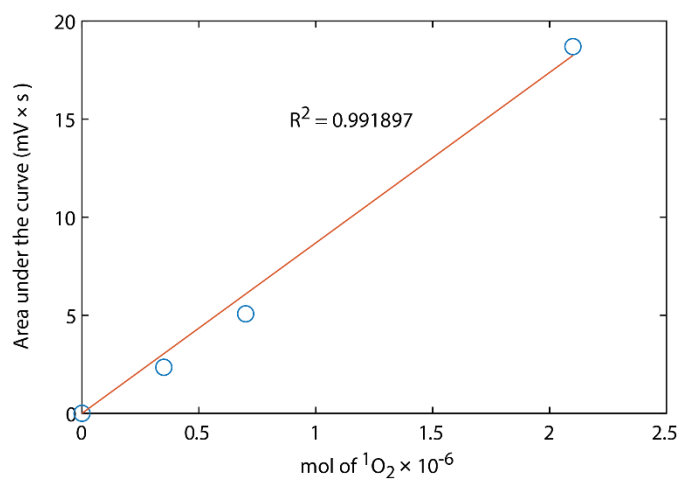

**Fig. S3** Comparison of the area under the curve found from an output signal, to the amount of  $^1\text{O}_2$  expected from the aqueous reaction of  $\text{H}_2\text{O}_2$  and  $\text{NaOCl}$ .

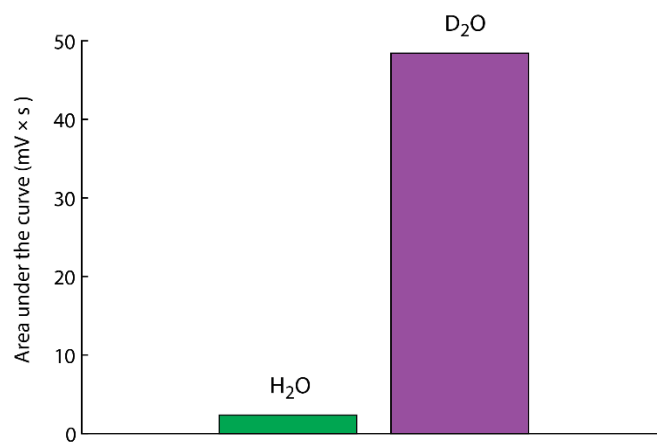

**Fig. S4** Comparison of the area under the curve found from the output signal with the same concentration of H<sub>2</sub>O<sub>2</sub> and NaOCl in H<sub>2</sub>O and in D<sub>2</sub>O. The difference between the areas under the curve is comparable between the difference in lifetime of <sup>1</sup>O<sub>2</sub> in H<sub>2</sub>O and D<sub>2</sub>O.<sup>4</sup>

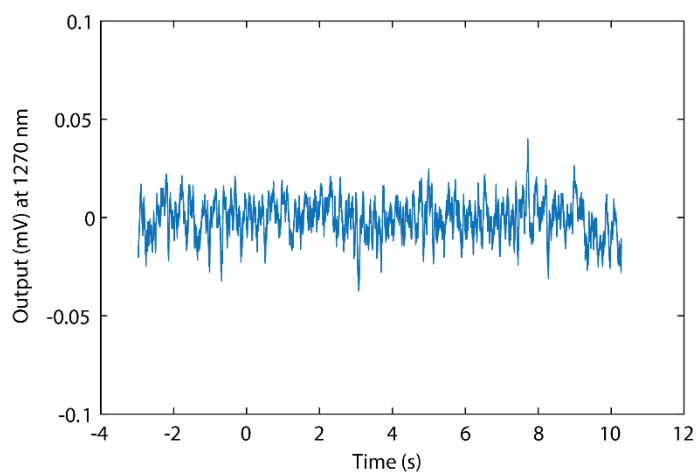

**Fig. S5** Output signal upon injecting TBA<sup>+</sup> solution into a KO<sub>2</sub>/crown ether (50 mM) suspension in acetonitrile. The time axis is relative to the injection time of the TBA<sup>+</sup> solution. The output signal is normalised at a gain of 600 V (control voltage).

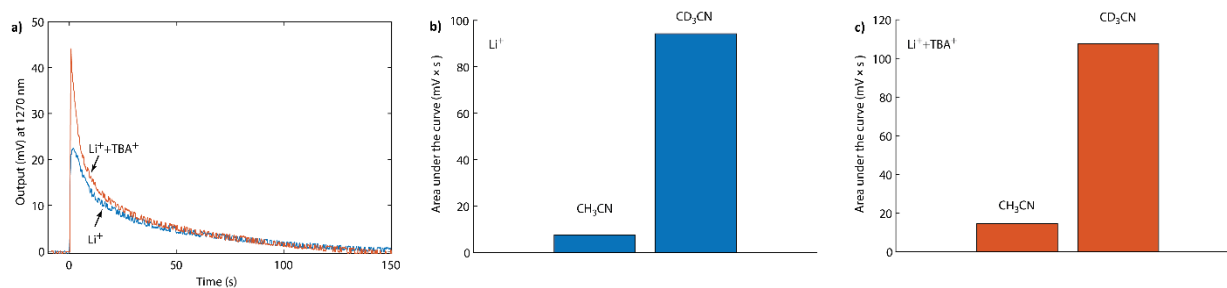

**Fig. S6** (a) Superoxide disproportionation and signal from  $^1\text{O}_2$  formation vs time upon disproportionation of a  $\text{KO}_2/\text{crown ether}$  (50 mM) suspension in acetonitrile- $d_3$  in the presence of a  $\text{Li}^+$ -containing electrolyte or an electrolyte with 1:9  $\text{Li}^+:\text{TBA}^+$ . The time axis is relative to injection time of the electrolyte solution. (b) and (c) Increase in the output signal as a function of area under the curve upon  $^1\text{O}_2$  generation from superoxide disproportionation in acetonitrile and acetonitrile- $d_3$ . The increase in the area under the curve is comparable with the increase in lifetime of acetonitrile and acetonitrile- $d_3$ .<sup>5</sup> The output signal is normalised at a gain of 600 V (control voltage).

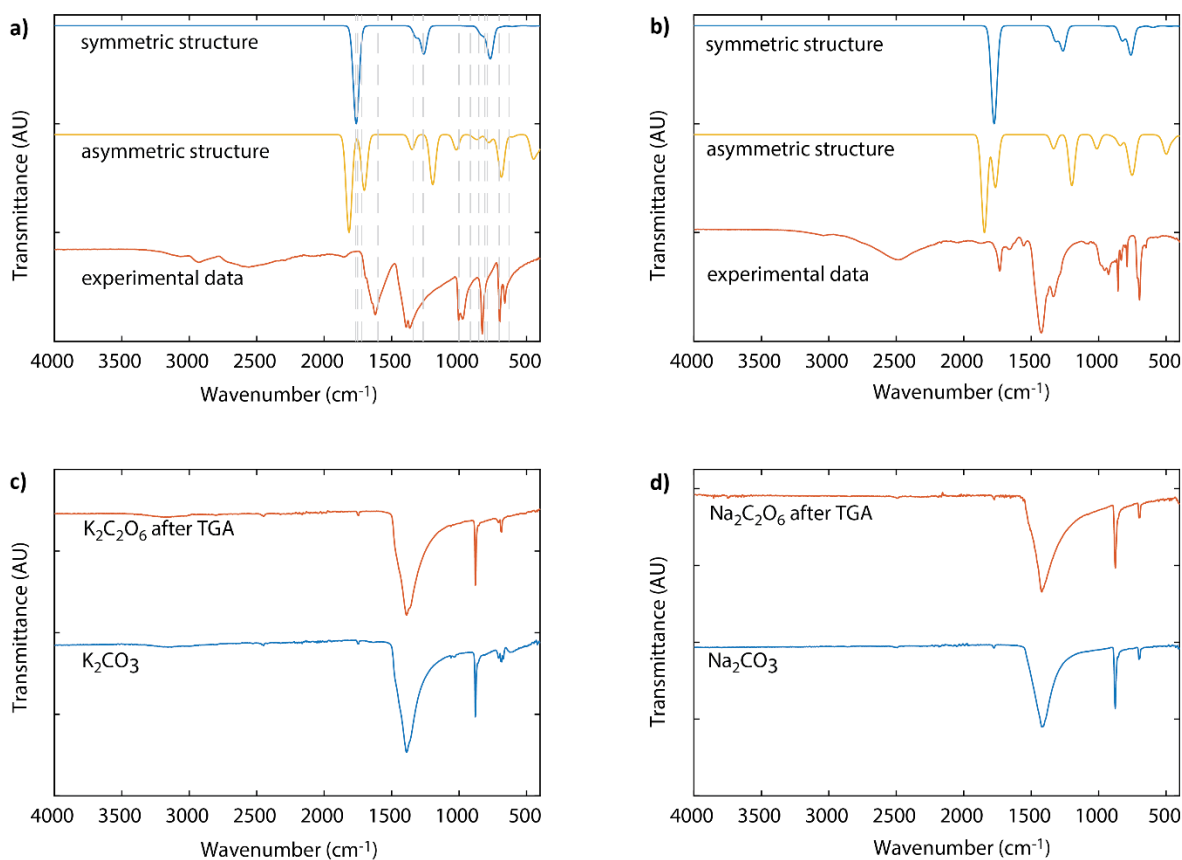

**Fig. S7** Infrared spectroscopy of potassium peroxod carbonate (a) and sodium peroxod carbonate (b) with DFT calculated IR spectra for both symmetric and asymmetric metal peroxod carbonates. The grey dashed lines in (a) correspond to literature reference frequencies for symmetric potassium peroxod carbonate from ref 6. Infrared spectroscopy of potassium peroxod carbonate (c) and sodium peroxod carbonate (d) after TGA compared to the spectra of the analogous metal carbonates.

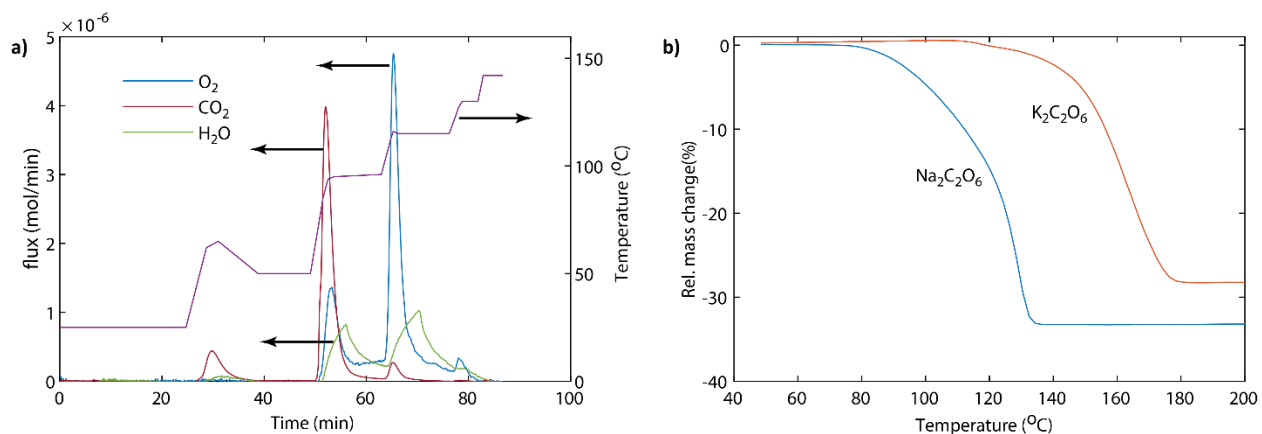

**Fig. S8** (a) CO<sub>2</sub>, O<sub>2</sub> and H<sub>2</sub>O evolution from mass spectrometry on heating sodium peroxodisulfate at different temperature steps indicating peroxy-bond decomposition and crystalline water removal. (b) Relative mass change (%) vs temperature from TGA. The convoluted mass change is a mixture of CO<sub>2</sub>, O<sub>2</sub> and H<sub>2</sub>O loss as indicated by mass spectrometry.

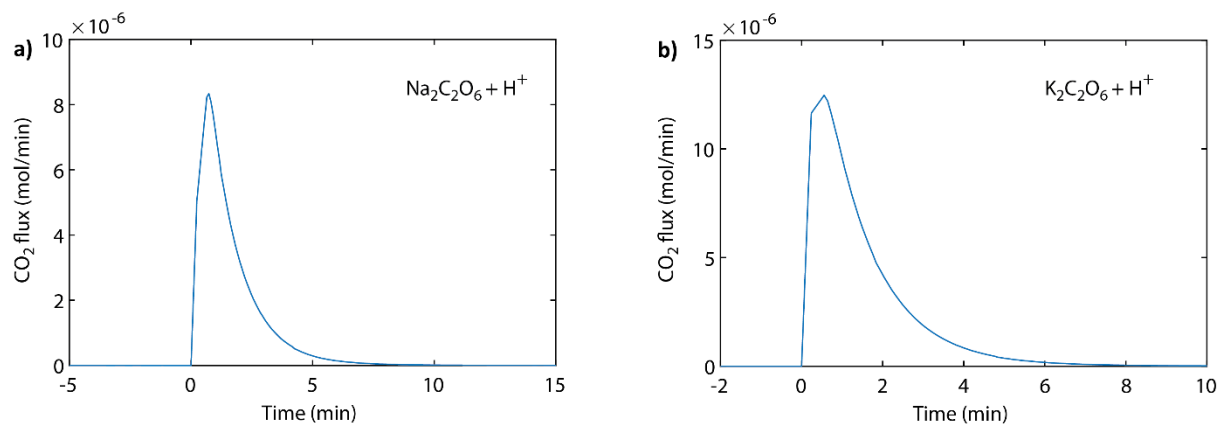

**Fig. S9** CO<sub>2</sub> evolution as measured by mass spectrometry upon adding sulphuric acid to the synthesised metal peroxodisulfates. The time axis is relative to the injection time of acid.

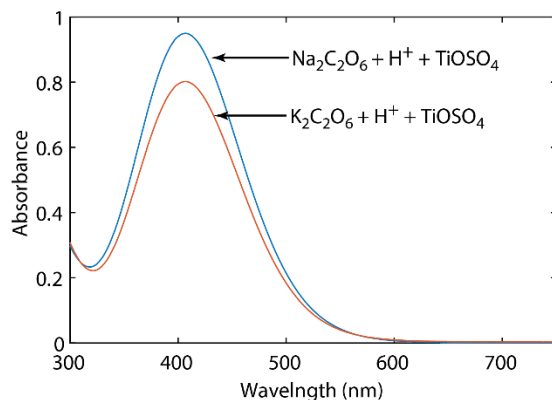

**Fig. S10** Measuring the peroxy- content in the synthesised metal peroxodicarbonates via UV-Vis spectroscopy after treating the sample with  $\text{TiOSO}_4$  in sulphuric acid.

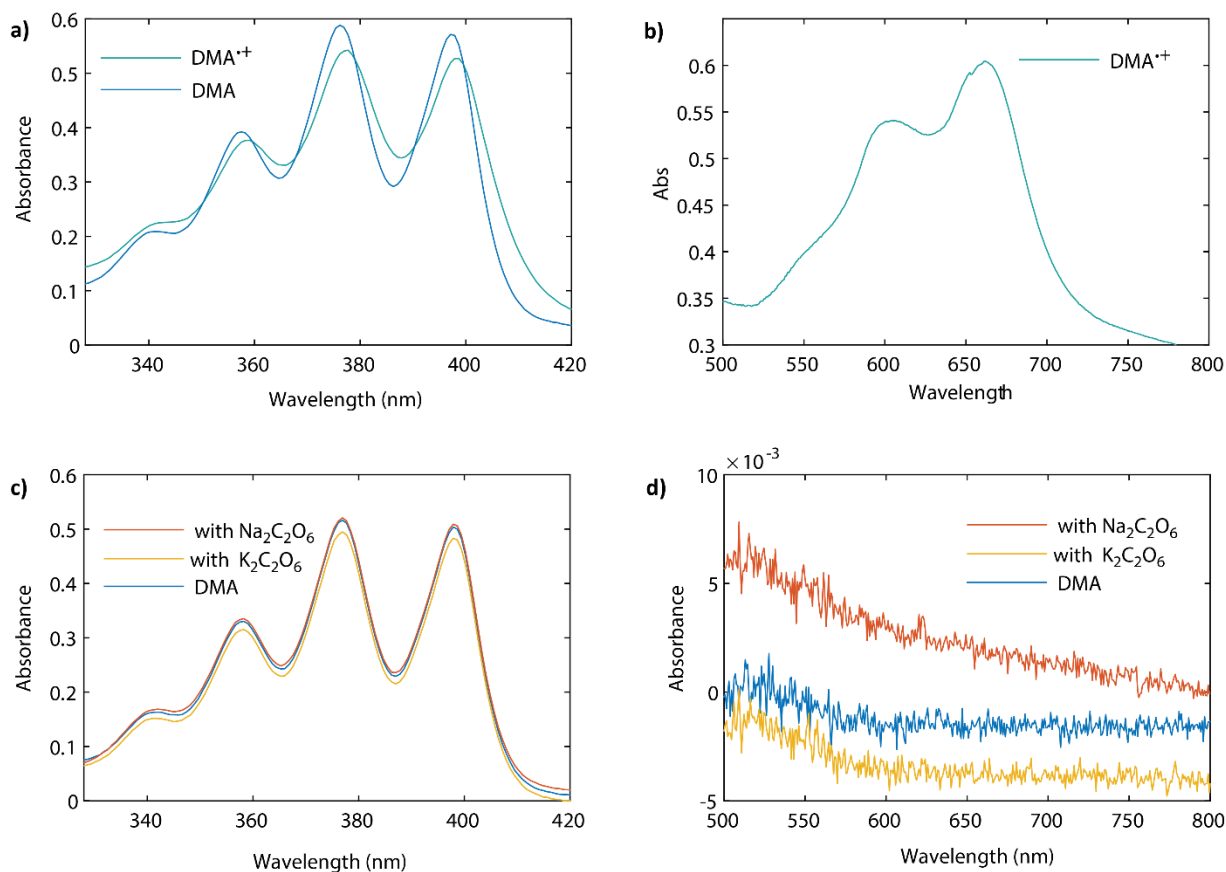

**Fig. S11** (a) UV-Vis spectra of DMA and DMA<sup>+</sup> in the UV region. (b) UV-Vis spectra of DMA<sup>+</sup> in the visible region. UV-Vis spectra of metal peroxodicarbonates in contact with DMA and DME together with reference spectra of DMA in the UV region (c) and visible region (d) of the electromagnetic spectrum. The combined concentration of DMA and DMA<sup>+</sup> in the solution was 0.07 mM (a & c) and 1.2 mM (b & d).

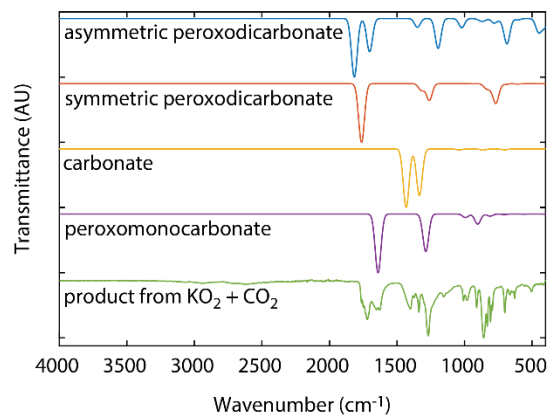

**Fig. S12** FTIR spectra of the reaction product formed by purging  $\text{CO}_2$  over  $\text{KO}_2$  suspension in DME and computed IR spectra from DFT calculation for the symmetric and asymmetric potassium peroxodicarbonate, potassium peroxomonocarbonate and potassium carbonate. The FTIR spectrum of the reaction product indicates that it is a mixture of symmetric and asymmetric potassium peroxodicarbonate, potassium peroxomonocarbonate, and potassium carbonate as proposed in Fig 4a.

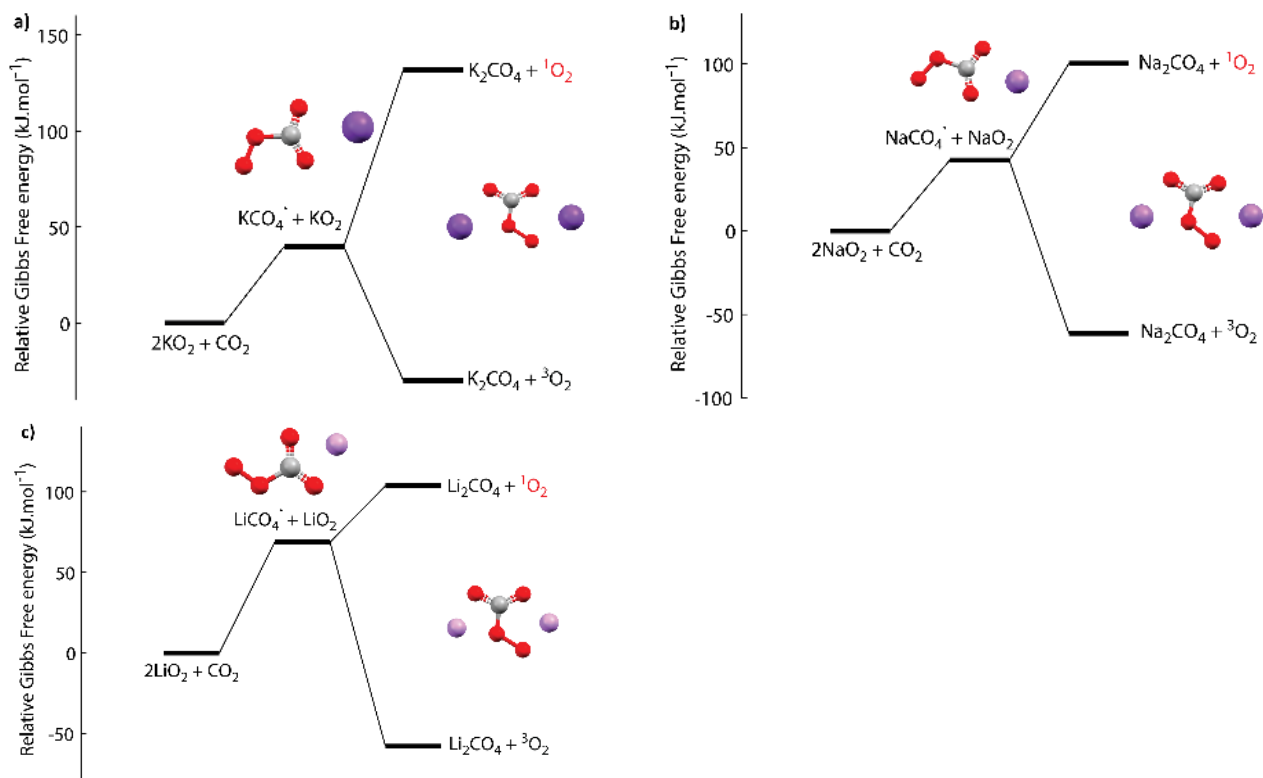

**Fig. S13** Figure showing the relative energies calculated by DFT (B3LYP<sup>7</sup>/def2TZVP<sup>8-11</sup>, implicit DME solvation<sup>12</sup>) along the reaction coordinate in  $\text{kJ}\cdot\text{mol}^{-1}$  of the potassiated (a), sodiated (b), and lithiated (c) peroxomonocarbonates and their respective proclivities towards  $^1\text{O}_2$  vs  $^3\text{O}_2$  release.

**Table S1:** Table listing the Gibbs Free Energies of the compounds used to calculate the reaction coordinates depicted in Fig. S13. The calculations were performed at the B3LYP<sup>7</sup>/def2QZVPP<sup>8-11</sup> level of theory with PCM<sup>12</sup> implicit solvation for DME applied.

| Compound                        | Gibbs Free Energy / 10 <sup>8</sup> kJ.mol <sup>-1</sup> |
|---------------------------------|----------------------------------------------------------|
| <sup>1</sup> O <sub>2</sub>     | -3.947510                                                |
| <sup>3</sup> O <sub>2</sub>     | -3.949126                                                |
| CO <sub>2</sub>                 | -4.954150                                                |
| LiO <sub>2</sub>                | -4.148877                                                |
| NaO <sub>2</sub>                | -8.212433                                                |
| KO <sub>2</sub>                 | -10.970291                                               |
| LiCO <sub>4</sub>               | -9.102339                                                |
| NaCO <sub>4</sub>               | -13.16616                                                |
| KCO <sub>4</sub>                | -24.65666                                                |
| Li <sub>2</sub> CO <sub>4</sub> | -9.303355                                                |
| Na <sub>2</sub> CO <sub>4</sub> | -17.43050                                                |
| K <sub>2</sub> CO <sub>4</sub>  | -40.41113                                                |



## DFT Coordinates

$^1\text{O}_2$

| Element | x         | y        | z        |
|---------|-----------|----------|----------|
| O       | -2.148528 | 1.708453 | 0.000000 |
| O       | -1.237432 | 0.923367 | 0.000000 |

$^3\text{O}_2$

| Element | x         | y        | z        |
|---------|-----------|----------|----------|
| O       | -2.148735 | 1.708632 | 0.000000 |
| O       | -1.237225 | 0.923188 | 0.000000 |

$\text{CO}_2$

| Element | x         | y        | z        |
|---------|-----------|----------|----------|
| C       | -0.287290 | 0.964487 | 0.000000 |
| O       | 0.711232  | 1.552169 | 0.000000 |
| O       | -1.285812 | 0.376803 | 0.000000 |

$\text{LiO}_2$

| Element | x         | y        | z        |
|---------|-----------|----------|----------|
| O       | -2.305448 | 2.203401 | 0.000000 |
| O       | -2.104420 | 0.876448 | 0.000000 |
| Li      | -3.854962 | 1.283431 | 0.000000 |

$\text{NaO}_2$

| Element | x         | y        | z        |
|---------|-----------|----------|----------|
| O       | -2.093337 | 2.156081 | 0.000000 |
| O       | -2.031093 | 0.812800 | 0.000000 |
| Na      | -4.140400 | 1.394400 | 0.000000 |

KO<sub>2</sub>

| Element | x         | y        | z        |
|---------|-----------|----------|----------|
| O       | -1.970745 | 2.143662 | 0.000000 |
| O       | -1.932028 | 0.805114 | 0.000000 |
| K       | -4.362047 | 1.414504 | 0.000000 |

LiCO<sub>4</sub>

| Element | x         | y        | z         |
|---------|-----------|----------|-----------|
| O       | -1.526632 | 1.051132 | 0.000020  |
| C       | -0.439830 | 1.647075 | 0.000002  |
| O       | 1.862325  | 1.304535 | -0.000010 |
| O       | 0.685038  | 0.721004 | 0.000005  |
| O       | -0.230739 | 2.861216 | -0.000016 |
| Li      | -2.182861 | 2.875087 | -0.000001 |

NaCO<sub>4</sub>

| Element | x         | y        | z         |
|---------|-----------|----------|-----------|
| O       | -1.452123 | 0.975508 | 0.000002  |
| C       | -0.400704 | 1.623235 | -0.000015 |
| O       | 1.932069  | 1.305627 | 0.000031  |
| O       | 0.766455  | 0.704818 | -0.000012 |
| O       | -0.186810 | 2.831262 | -0.000030 |
| Na      | -2.491577 | 3.019621 | 0.000025  |

KCO<sub>4</sub>

| Element | x         | y        | z         |
|---------|-----------|----------|-----------|
| O       | -1.387090 | 0.923099 | 0.000001  |
| C       | -0.359447 | 1.599293 | 0.000006  |
| O       | 1.997616  | 1.283758 | -0.000011 |
| O       | 0.836875  | 0.677622 | 0.000002  |
| O       | -0.143158 | 2.803145 | 0.000012  |
| K       | -2.777486 | 3.173143 | -0.000010 |

**Li<sub>2</sub>CO<sub>4</sub>**

| Element | x         | y         | z         |
|---------|-----------|-----------|-----------|
| O       | -1.414173 | 1.592253  | -0.018136 |
| C       | -0.159210 | 1.484356  | -0.006887 |
| O       | 1.626205  | -0.139756 | 0.021476  |
| O       | 0.199800  | 0.150713  | 0.008018  |
| O       | 0.718898  | 2.360603  | -0.007509 |
| Li      | -1.675425 | -0.257544 | -0.004939 |
| Li      | 2.350755  | 1.514566  | 0.007977  |

**Na<sub>2</sub>CO<sub>4</sub>**

| Element | x         | y         | z         |
|---------|-----------|-----------|-----------|
| O       | -1.400247 | 1.710383  | 0.063148  |
| C       | -0.152218 | 1.532222  | 0.041639  |
| O       | 1.539938  | -0.230334 | -0.069988 |
| O       | 0.142421  | 0.180608  | -0.036066 |
| O       | 0.752858  | 2.382293  | 0.080955  |
| Na      | -2.016488 | -0.422482 | -0.028584 |
| Na      | 2.780575  | 1.552501  | -0.051103 |

**K<sub>2</sub>CO<sub>4</sub>**

| Element | x         | y         | z         |
|---------|-----------|-----------|-----------|
| O       | -1.374261 | 1.815459  | 0.000233  |
| C       | -0.136351 | 1.561684  | 0.000141  |
| O       | 1.477453  | -0.249539 | -0.000190 |
| O       | 0.090591  | 0.199874  | -0.000094 |
| O       | 0.813926  | 2.363792  | 0.000233  |
| K       | -2.420199 | -0.505194 | -0.000233 |
| K       | 3.195331  | 1.517392  | -0.000089 |

## Supplementary References

1. S. M. Borisov, G. Nuss, W. Haas, R. Saf, M. Schmuck and I. Klimant, *J. Photochem. Photobiol. A*, 2009, **201**, 128-135.
2. A. U. Khan, *Journal of Bioluminescence and Chemiluminescence*, 1989, **4**, 200-207.
3. J. Regensburger, T. Maisch, A. Felgenträger, F. Santarelli and W. Bäumlner, *Journal of Biophotonics*, 2010, **3**, 319-327.
4. C. Schweitzer and R. Schmidt, *Chemical Reviews*, 2003, **103**, 1685-1758.
5. P. R. Ogilby and C. S. Foote, *Journal of the American Chemical Society*, 1983, **105**, 3423-3430.
6. P. A. Giguère and D. Lemaire, *Canadian Journal of Chemistry*, 1972, **50**, 1472-1477.
7. A. D. Becke, *The Journal of Chemical Physics*, 1993, **98**, 5648-5652.
8. A. Schäfer, C. Huber and R. Ahlrichs, *The Journal of Chemical Physics*, 1994, **100**, 5829-5835.
9. A. Schäfer, H. Horn and R. Ahlrichs, *The Journal of Chemical Physics*, 1992, **97**, 2571-2577.
10. F. Weigend, *Physical Chemistry Chemical Physics*, 2006, **8**, 1057-1065.
11. F. Weigend and R. Ahlrichs, *Physical Chemistry Chemical Physics*, 2005, **7**, 3297-3305.
12. G. Scalmani and M. J. Frisch, *The Journal of Chemical Physics*, 2010, **132**.
